# Supplementary material for: Fuzzy Boundaries: Color and Gene Flow Patterns among Parapatric Lineages of the Western Shovel-Nosed Snake and Taxonomic Implication
Source: PLoS One. 2014 May 21;9(5):e97494. doi: 10.1371/journal.pone.0097494 (PMC4029750; doi:10.1371/journal.pone.0097494)
Supplement: Table S1 — Tissue samples of Chionactis occipitalis used in this study along with locality information, Dryad Digital Repository, doi:10.5061/dryad.77rf2. (XLSX) [file pone.0097494.s006.xlsx]

## Sheet: Sheet1
Table S1. Tissue samples used in this study along with mtDNA lineage/clade and microsatellite cluster assignments, morphology, and locality information. Abbreviations and field series abbreviations are as follows: ASU, Arizona State University; ATH, Andrew T. Holycross; BEZY, Robert L. Bezy;DAW, Dustin A. Wood; DGM, Daniel G. Mulcahy; JESMM, Jesse M. Meik; RDB, Randy Babb; RNF, Robert N. Fisher; …
Tissue ID	Voucher ID	Species	mtDNA lineage, clade	Microsatellite Cluster (posterior probability)	Morphology scored	Country	State	County	LocalityName	Latitude	Longitude
SDField_2159	−	C. annulata	Colorado, F	Colorado (1.0)	−	Mexico	Baja California Norte		Laguna Percubu, 15.7 km NNW of, on Mex Hwy 5	30.9498	-114.76
SDField_2178	−	C. annulata	Colorado, F	Colorado (1.0)	−	Mexico	Baja California Norte		Laguna Percubu, 8.6 km SSW of, on Mex Hwy 5	30.7408	-114.72
RWM_1170	−	C. annulata	Colorado, F	Colorado (0.8)	−	Mexico	Baja California Norte		San Felipe vicinity	31.0247	-114.84
RWM_1169	−	C. annulata	Colorado, F	Colorado (0.9)	−	Mexico	Baja California Norte		San Felipe vicinity	31.0247	-114.84
RWM_1171	−	C. annulata	Colorado, F	Colorado (0.9)	−	Mexico	Baja California Norte		San Felipe vicinity	31.0247	-114.84
SDField_2146	−	C. annulata	Colorado, F	Colorado (1.0)	−	Mexico	Baja California Norte		San Felipe, 12.2 km SSE of, on Mex Hwy 5	30.9566	-114.788
ROM_JRO_077	ROM_JRO_077	C. annulata	Colorado, F	Colorado (0.9)	−	Mexico	Baja California Norte		San Felipe, 20 mi N	31.3724	-115.024
ROM_JRO_076	ROM_JRO_076	C. annulata	Colorado, F	Colorado (1.0)	−	Mexico	Baja California Norte		San Felipe, 20 mi N	31.3724	-115.024
ROM_JRO_075	ROM_JRO_075	C. annulata	Colorado, F	Colorado (1.0)	−	Mexico	Baja California Norte		San Felipe, 20.5 mi N	31.383	-115.028
ROM_JRO_074	ROM_JRO_074	C. annulata	Colorado, F	Colorado (1.0)	−	Mexico	Baja California Norte		San Felipe, 25.7 mi N	31.4943	-115.072
ROM_JRO_073	ROM_JRO_073	C. annulata	Colorado, F	Colorado (1.0)	−	Mexico	Baja California Norte		San Felipe, 26 mi N	31.4943	-115.072
SDField_2207	−	C. annulata	Colorado, F	Colorado (1.0)	−	Mexico	Baja California Norte		San Matias, 12.3 km SE of, on Mex Hwy 3	31.3006	-115.421
SDField_2203	−	C. annulata	−	Colorado (1.0)	−	Mexico	Baja California Norte		San Matias, 13.3 km SE of, on Mex Hwy 3	31.2992	-115.411
SDField_2120	−	C. annulata	Colorado, F	Colorado (0.7)	−	Mexico	Baja California Norte		San Matias, 15.6 km SE of, on Mex Hwy 3	31.2945	-115.387
SDField_2126	−	C. annulata	Colorado, F	Colorado (1.0)	−	Mexico	Baja California Norte		San Matias, 15.6 km SE of, on Mex Hwy 3	31.2945	-115.388
SDField_2204	−	C. annulata	Colorado, F	Colorado (1.0)	−	Mexico	Baja California Norte		San Matias, 15.7 km SE of, on Mex Hwy 3	31.2943	-115.386
SDField_2128	−	C. annulata	Colorado, F	Colorado (0.8)	−	Mexico	Baja California Norte		San Matias, 16.0 km SE of, on Mex Hwy 3	31.2936	-115.383
ROM15005	ROM15005	C. annulata	Colorado, G	Colorado (0.7)	X	Mexico	Sonora		Hwy 8	31.6861	-113.291
ROM15006	ROM15006	C. annulata	Colorado, G	Colorado (0.8)	X	Mexico	Sonora		Hwy 8	31.6861	-113.291
ROM15007	ROM15007	C. annulata	Colorado, G	Colorado (0.9)	X	Mexico	Sonora		Hwy 8	31.6861	-113.291
ROM14197	ROM14197	C. annulata	Colorado, G	Colorado (1.0)	X	Mexico	Sonora		Puerto Penasco, 40 km E	31.25	-113.16
ROM14577	ROM14577	C. annulata	Colorado, G	Sonoran (0.8)	X	Mexico	Sonora		Sonoita, 33 km SW, on Hwy 8	31.67	-113.32
ATH_706	SDSNH 72843	C. annulata	Sonoran, E	Sonoran (0.9)	X	USA	Arizona	La Paz	Alamo Dam Rd, 30.8 miles N of Hwy60, S of Alamo Lake	34.1313	-113.531
TCB_117	ASU_35072	C. annulata	Sonoran, E	Sonoran (1.0)	−	USA	Arizona	La Paz	E of Parker on Shea Rd (Osborne Well Rd) ca. 5 mi E of Hwy 95	34.1455	-114.2
ATH_520	SDSNH 68897	C. annulata	−	Sonoran (0.9)	X	USA	Arizona	La Paz	Hwy 95; 5.8 mi S of jct w/ Hwy 72	33.9101	-114.211
TRJ_942	−	C. annulata	−	Sonoran (1.0)	−	USA	Arizona	Maricopa	AZ hwy 238, 21.05 rd mi W jct AZ hwy 347	33.0144	-112.392
TRJ_943	−	C. annulata	Sonoran, C	Sonoran (1.0)	−	USA	Arizona	Maricopa	AZ hwy 238, 21.35 rd mi W jct AZ hwy 347	33.011	-112.399
TRJ_940	−	C. annulata	Sonoran, C	Sonoran (1.0)	−	USA	Arizona	Maricopa	AZ hwy 238, 21.4 rd mi W jct AZ hwy 347	33.0116	-112.397
TRJ_941	−	C. annulata	Sonoran, C	Sonoran (1.0)	−	USA	Arizona	Maricopa	AZ hwy 238, 22.35 rd mi W jct AZ hwy 347	33.0064	-112.411
CHOC10452	−	C. annulata	Sonoran, C	Sonoran (0.7)	−	USA	Arizona	Maricopa	AZ hwy 238, 38.9 rd mi W jct AZ hwy 347	32.9525	-112.671
CHOC10455	−	C. annulata	Sonoran, C	Sonoran (0.9)	−	USA	Arizona	Maricopa	AZ hwy 238, 8.3 rd mi W jct AZ hwy 347	33.0719	-112.184
CHOC10450	−	C. annulata	Sonoran, C	Sonoran (1.0)	−	USA	Arizona	Maricopa	AZ Hwy 238, 9.7 rd mi W jct AZ hwy 347	33.0709	-112.208
ATH_707	SDSNH 72852	C. annulata	Sonoran, C	Sonoran (0.9)	X	USA	Arizona	Maricopa	AZ, Maricopa Co, Hwy 238 W of Mobile E of Maricopa Mtns	33.0336	-112.355
ATH_708	SDSNH 72840	C. annulata	Sonoran, C	Sonoran (1.0)	X	USA	Arizona	Maricopa	Eagle Eye Rd, N. of Salome Rd., 10 miles S. of Aguila	33.811	-113.182
ATH_722	SDSNH 72829	C. annulata	Sonoran, C	Sonoran (0.9)	X	USA	Arizona	Maricopa	Eagle Eye Road, N of Salome Rd.	33.6561	-113.301
CHOCDAW1	−	C. annulata	Sonoran, C	Admixed	−	USA	Arizona	Maricopa	Luke Airforce Base	31.6861	-113.291
TRJ_926	SDSNH 72833	C. annulata	Sonoran, C	Admixed	X	USA	Arizona	Maricopa	Maricopa Rd. (Hwy 238) 1.5 rd. miles E of Hwy 85 jct @ Gila Bend	32.9562	-112.672
TRJ_833	−	C. annulata	Sonoran, C	Sonoran (0.9)	−	USA	Arizona	Maricopa	Maricopa Rd. (Hwy 238) 22.7 rd. miles W of Hwy 347	33.0049	-112.418
TRJ_1001	−	C. annulata	Sonoran, C	Sonoran (1.0)	−	USA	Arizona	Maricopa	Maricopa road, 17.35 rd mi E jct AZ hwy 85	33.0048	-112.418
DAW11_002	−	C. annulata	Sonoran, C	Admixed	−	USA	Arizona	Maricopa	Maricopa road, 33.4 mi W o fjct SR347	32.9682	-112.582
TRJ_1002	−	C. annulata	−	Sonoran (0.9)	−	USA	Arizona	Maricopa	Maricopa road, 7.45 rd mi E jct AZ hwy 85	32.9722	-112.569
DAW11_003	−	C. annulata	Sonoran, C	Sonoran (0.9)	X	USA	Arizona	Maricopa	Salome road, 2 mi N of I-10	33.5518	-113.191
DAW_334	−	C. annulata	Sonoran, C	Colorado (0.8)	−	USA	Arizona	Maricopa	State Route 85	32.6781	-112.855
DAW_335	−	C. annulata	Sonoran, C	Sonoran (1.0)	−	USA	Arizona	Maricopa	Sun Valley Parkway, 8.2 road miles W of McMicken Dike	33.6606	-112.596
ATH_710	SDSNH 72850	C. annulata	Sonoran, C	Sonoran (1.0)	X	USA	Arizona	Maricopa	Sun Valley Parkway, 9.9 miles N of I10	33.5822	-112.687
ATH_713	SDSNH 72849	C. annulata	Sonoran, C	Sonoran (0.9)	X	USA	Arizona	Maricopa	Sun Valley Parkway, S. of McDowell	33.4634	-112.678
ATH_712	SDSNH 72839	C. annulata	Sonoran, C	Sonoran (1.0)	X	USA	Arizona	Maricopa	Sun Valley Parkway, W of ~219th Ave	33.6607	-112.546
DAW11_070	−	C. annulata	Sonoran, C	Sonoran (1.0)	−	USA	Arizona	Maricopa	Vulture Mine Road, 2.1 rd mi N Aguila Rd.	33.7466	-112.868
DAW11_001	−	C. annulata	Sonoran, C	Sonoran (1.0)	−	USA	Arizona	Maricopa	Vulture Mine Road, btw mile marker 9 and 10, south of Wickenberg	33.76	-112.862
BEZY6738	−	C. annulata	Sonoran, C	Sonoran (0.9)	−	USA	Arizona	Maricopa	1.2 mi (by road) W Mobile	33.0516	-112.286
BEZY6661	−	C. annulata	Sonoran, C	Sonoran (0.9)	−	USA	Arizona	Maricopa	16.1 mi (by road) WSW Mobile	32.9957	-112.519
BEZY6752	−	C. annulata	Sonoran, C	Sonoran (1.0)	−	USA	Arizona	Maricopa	5.3 mi (By road) W Mobile	32.9944	-112.311
BEZY6660	−	C. annulata	Sonoran, C	Sonoran (1.0)	−	USA	Arizona	Maricopa	5.6 mi (by road) WSW Mobile	32.9944	-112.311
BEZY6857	−	C. annulata	Sonoran, C	Sonoran (1.0)	−	USA	Arizona	Maricopa	7.2 mi (by Hwy 238) WSW Mobile	33.0202	-112.382
BEZY6750	−	C. annulata	Sonoran, C	Sonoran (1.0)	−	USA	Arizona	Maricopa	8.0 mi (by road) E Mobile	33.0791	-112.132
TRJ_840	−	C. annulata	Sonoran, C	Sonoran (0.9)	−	USA	Arizona	Maricopa	AZ hwy 238, 15.05 rd mi W jct AZ hwy 347	33.049	-112.297
TRJ_839	−	C. annulata	Sonoran, C	Sonoran (1.0)	−	USA	Arizona	Maricopa	AZ hwy 238, 17.7 rd mi W jct AZ hwy 347	33.0377	-112.342
TRJ_838	−	C. annulata	−	Sonoran (0.9)	−	USA	Arizona	Maricopa	AZ hwy 238, 22.9 rd mi W jct AZ hwy 347	33.0028	-112.42
DAW_265	SDSNH 76094	C. annulata	Sonoran, C	Colorado (0.8)	X	USA	Arizona	Maricopa	ca. 1.1 mi N of Sentinel on Agua Caliente Road	32.8776	-113.222
ATH_585	ASU_34683	C. annulata	Sonoran, C	Sonoran (1.0)	X	USA	Arizona	Maricopa	Eagle Eye Rd., 0.3 mi S of Pump Mine Wash	33.786	-113.208
ATH_586	ASU_34684	C. annulata	Sonoran, C	Admixed	X	USA	Arizona	Maricopa	Eagle Eye Rd., 0.75 mi S of Pump Mine Wash	33.7818	-113.214
DAW_286	SDSNH 76096	C. annulata	Sonoran, C	Sonoran (1.0)	X	USA	Arizona	Maricopa	Eagle Eye Road, ca. 7 mi S of Hwy 60 at cattle crossing	33.8554	-113.181
DAW_293	SDSNH 76097	C. annulata	−	Sonoran (0.9)	X	USA	Arizona	Maricopa	Salome Road, 8.6 mi E of Jct with Eagle Eye Road	33.5479	-113.183
TCB_195	UAZ 56456	C. annulata	Sonoran, D	Mojave (1.0)	−	USA	Arizona	Mohave	S of Yucca on I40 Frontage Rd (E side hwy.), 6.6 miles S of Yucca	34.7822	-114.179
TCB_196	UAZ 65457	C. annulata	Sonoran, D	Mojave (1.0)	−	USA	Arizona	Mohave	S of Yucca on I40 Frontage Rd (E side hwy.), 7.4 miles S of Yucca	34.7715	-114.194
RDB_0074	−	C. annulata	Sonoran, C	Colorado (0.8)	X	USA	Arizona	Pima	Hwy 85 S of Ajo	32.3062	-112.76
TRJ_981	−	C. annulata	Colorado, G	Admixed	−	USA	Arizona	Pima	Pinta Sands, N of Las Playas; Cabeza Prieta NWR	32.1004	-113.45
BEZY6794	−	C. annulata	Sonoran, C	Sonoran (1.0)	−	USA	Arizona	Pinal	ca 5.0 (by road) NNW Vaiva Vo (Cockleur); 0.1 mi N Tohono Boundary	32.7705	-111.964
RLB_6829	−	C. annulata	Sonoran, C	−	−	USA	Arizona	Pinal	Florence	33.2465	-111.344
DAW11_068	−	C. annulata	Sonoran, C	Sonoran (0.9)	−	USA	Arizona	Pinal	Florence Military Reservation study site	33.1202	-111.358
DAW11_062	−	C. annulata	Sonoran, C	Sonoran (1.0)	−	USA	Arizona	Pinal	Florence Military Reservation study site	33.116	-111.371
DAW11_063	−	C. annulata	Sonoran, C	Sonoran (1.0)	−	USA	Arizona	Pinal	Florence Military Reservation study site	33.116	-111.385
DAW11_064	−	C. annulata	Sonoran, C	Sonoran (1.0)	−	USA	Arizona	Pinal	Florence Military Reservation study site	33.114	-111.366
DAW11_065	−	C. annulata	Sonoran, C	Sonoran (1.0)	−	USA	Arizona	Pinal	Florence Military Reservation study site	33.116	-111.385
DAW11_067	−	C. annulata	Sonoran, C	Sonoran (1.0)	−	USA	Arizona	Pinal	Florence Military Reservation study site	33.1095	-111.379
DAW11_069	−	C. annulata	Sonoran, C	Sonoran (1.0)	−	USA	Arizona	Pinal	Florence Military Reservation study site	33.1202	-111.358
ATH_582	ASU_34623	C. annulata	Sonoran, C	Sonoran (1.0)	X	USA	Arizona	Pinal	Hwy 79, 1.4 mi S of RR Xing	33.2107	-111.346
ATH_583	ASU_34624	C. annulata	−	−	X	USA	Arizona	Pinal	Hwy 79, 2.2 mi N of Arizona Farms Rd	33.1497	-111.356
ATH_577	ASU_34622	C. annulata	Sonoran, C	Sonoran (1.0)	X	USA	Arizona	Pinal	Hwy 79, 4.4 mi S of RR Xing	33.1711	-111.353
DAW_300	SDSNH 76098	C. annulata	Sonoran, C	Sonoran (1.0)	X	USA	Arizona	Pinal	Hwy 79, 4.9 mi S of RR crossing	33.1671	-111.354
TCB_182	SDSNH 72836	C. annulata	Sonoran, C	Sonoran (1.0)	X	USA	Arizona	Pinal	Hwy 79, 5.3 miles S of Florence Jct	33.1797	-111.352
DAW_301	SDSNH 76099	C. annulata	Sonoran, C	Sonoran (1.0)	X	USA	Arizona	Pinal	Hwy 79, 5.9 mi S of RR crossing	33.1534	-111.356
DAW_302	−	C. annulata	Sonoran, C	Sonoran (1.0)	−	USA	Arizona	Pinal	Hwy 79, 6.8 mi S of RR crossing	33.1272	-111.36
TCB_180	SDSNH 72834	C. annulata	Sonoran, C	Sonoran (1.0)	X	USA	Arizona	Pinal	Hwy 79, 6.8 miles S of Florence Jct	33.1583	-111.355
TCB_181	SDSNH 72831	C. annulata	Sonoran, C	Sonoran (1.0)	X	USA	Arizona	Pinal	Hwy 79, 9.4 miles S of Florence Jct	33.1228	-111.361
DAW_303	SDSNH 76100	C. annulata	Sonoran, C	Sonoran (1.0)	X	USA	Arizona	Pinal	Hwy 79, ca. 2 mi N of Arizona Farms Road	33.1581	-111.355
TCB_124	ASU_35076	C. annulata	Sonoran, C	Sonoran (1.0)	−	USA	Arizona	Pinal	Hwy 79: ca. 6 mi S of Florence Jct	33.171	-111.353
TCB_126	ASU_35071	C. annulata	Sonoran, C	Sonoran (1.0)	−	USA	Arizona	Pinal	Hwy 79: ca. 6.5 mi S of Florence Jct	33.1619	-111.355
ATH_717	SDSNH 72847	C. annulata	Sonoran, C	Sonoran (1.0)	X	USA	Arizona	Pinal	Maricopa - Casa Grande Hwy, 1.2 miles E of Val Vista Rd.	32.9601	-111.891
ATH_718	SDSNH 72832	C. annulata	Sonoran, C	Sonoran (1.0)	X	USA	Arizona	Pinal	Maricopa - Casa Grande Hwy., 0.2 miles E of Montgomery Rd.	32.9673	-111.903
BEZY6981	−	C. annulata	Sonoran, C	Sonoran (1.0)	−	USA	Arizona	Pinal	Picacho Hwy, 0.2 mi S Nutt Raod, 0.8 mi N Harmon Rd	32.7007	-111.506
ATH_716	−	C. annulata	Sonoran, C	Sonoran (1.0)	−	USA	Arizona	Pinal	San Tan Mtns, intersection of Royce & Judd Rds	33.1763	-111.617
ATH_709	SDSNH 72835	C. annulata	Sonoran, C	Sonoran (1.0)	X	USA	Arizona	Pinal	San Tan Mtns, W.Phillips Rd, S of Hunt Hwy.	33.1687	-111.629
ATH_711	SDSNH 72837	C. annulata	Sonoran, C	Sonoran (1.0)	X	USA	Arizona	Pinal	San Tan Mtns, W.Phillips Rd, S of Hunt Hwy.	33.1688	-111.626
DAW11_066	−	C. annulata	Sonoran, C	Sonoran (1.0)	−	USA	Arizona	Pinal	SR 77 near Florence Military Reservation Control	33.1089	-111.369
DAW11_061	−	C. annulata	Sonoran, C	Sonoran (1.0)	−	USA	Arizona	Pinal	SR 77 on Florence Military Reservation	33.101	-111.372
ATH_715	SDSNH 72848	C. annulata	Sonoran, C	Sonoran (1.0)	X	USA	Arizona	Pinal	Val Vista Rd, 1.7 miles NE of Maricopa - Casa Grande Hwy.	32.9694	-111.936
ATH_714	SDSNH 72838	C. annulata	Sonoran, C	Sonoran (1.0)	X	USA	Arizona	Pinal	Val Vista Rd., 1.3 miles W of AZ387, N of Casa Grande	32.9673	-111.779
ATH_723	SDSNH 72830	C. annulata	Sonoran, C	Sonoran (1.0)	−	USA	Arizona	Pinal	West Phillips Road, South of Hunt Hwy near the Santan Mountains	33.167	-111.623
TRJ_936	SDSNH 72842	C. annulata	Sonoran, E	Sonoran (1.0)	X	USA	Arizona	Yavapai	Hwy 71, 10.0 mi SW jct Hwy 93	33.9936	-113.129
TRJ_937	SDSNH 72845	C. annulata	Sonoran, E	Sonoran (0.8)	X	USA	Arizona	Yavapai	Hwy 71, 15.3 mi SW jct Hwy 93	33.9776	-113.14
DAW11_060	−	C. annulata	Colorado, F	Colorado (0.9)	−	USA	Arizona	Yuma	2.8 rd mi SE of end of Co 23rd street	32.4747	-114.52
DAW_279	SDSNH 76095	C. annulata	Sonoran, E	Colorado (0.8)	X	USA	Arizona	Yuma	Avenue 64 (Dateland Road), 13 mi W of Yuma/ Maricopa Co. Line	32.9363	-113.524
JESMM_3	−	C. annulata	−	Colorado (0.9)	−	USA	Arizona	Yuma	Barry M Goldwater Airforce Base Ca 6mi SE of 19th ST, Yuma AZ	32.4857	-114.518
JESMM_1	−	C. annulata	Colorado, F	Colorado (0.7)	−	USA	Arizona	Yuma	Barry M Goldwater Airforce Base Ca 6mi SE of 19th ST, Yuma AZ	32.4857	-114.518
JESMM_2	−	C. annulata	Colorado, F	Colorado (0.9)	−	USA	Arizona	Yuma	Barry M Goldwater Airforce Base Ca 6mi SE of 19th ST, Yuma AZ	32.4857	-114.518
DAW10-009	−	C. annulata	Colorado, G	Colorado (0.7)	−	USA	Arizona	Yuma	East Pinta Sands, Cabeza Prieta NWR	32.0901	-113.474
ATH_719	SDSNH 72851	C. annulata	Sonoran, E	Colorado (0.9)	X	USA	Arizona	Yuma	Hwy 95 S of Quartzite	33.4921	-114.217
ATH_720	SDSNH 72846	C. annulata	Sonoran, E	Colorado (0.9)	X	USA	Arizona	Yuma	Hwy 95 S of Quartzite, 1.8 miles S of Palm Canyon Rd.	33.3623	-114.217
DAW10_007	−	C. annulata	Sonoran, E	Sonoran (0.8)	X	USA	Arizona	Yuma	Kofa Mountains, near Scott Tank	33.5003	-114.056
DAW_342	SDSNH 76118	C. annulata	Sonoran, C	Colorado (0.7)	X	USA	Arizona	Yuma	Mohawk Dunes	32.6981	-113.789
DGM_848	UTA R-54424	C. annulata	Sonoran, C	Admixed	−	USA	Arizona	Yuma	Mohawk Dunes	32.6981	-113.789
DGM_849	UTA R-54425	C. annulata	Sonoran, C	Colorado (0.9)	−	USA	Arizona	Yuma	Mohawk Dunes	32.6981	-113.789
DAW_347	SDSNH 76119	C. annulata	Colorado, F	Colorado (0.9)	X	USA	Arizona	Yuma	North of CTY 17 wash, approximately 800 yds west of 10E	32.5915	-114.48
ATH_724	SDSNH 72841	C. annulata	Colorado, F	Colorado (0.7)	X	USA	Arizona	Yuma	Redondo Rd, just S of Hwy 95	32.6914	-114.491
DAW10-008	−	C. annulata	Colorado, G	Admixed	−	USA	Arizona	Yuma	West Pinta Sands, Cabeza Prieta NWR	32.1176	-113.56
TCB_150	ASU_35960	C. annulata	Colorado, F	Colorado (0.9)	−	USA	Arizona	Yuma	Yuma Dunes, vicinity of County Rd. 21 and Avenue A	32.4947	-114.625
ASU_34682	ASU_34682	C. annulata	Colorado, F	Colorado (1.0)	X	USA	California	Imperial	Algadones Dunes; ca. 1/8 mi S of Ogilby exit off I-8	32.759	-114.836
SDField_2773	SDSNH 75667	C. annulata	Colorado, F	Colorado (0.8)	X	USA	California	Imperial	Borrego Springs	33.2574	-116.309
JESMM_111	−	C. annulata	Colorado, F	−	−	USA	California	Imperial	Cargo Muchacho Mtns: st Hwy 34 (Ogilby Rd); 1.1 rd mi N of jct I-8	32.7766	-114.836
DAW_330	SDSNH 76116	C. annulata	Colorado, F	Colorado (0.8)	X	USA	California	Imperial	Hwy 78, 0.35 mi W of Gecko Road (Imperial Dunes: Glamis)	32.9746	-115.18
DAW_331	SDSNH 76117	C. annulata	Colorado, F	Colorado (0.8)	X	USA	California	Imperial	Hwy 78, 1.2 mi E of Gecko Road (Imperial Dunes: Glamis)	32.9801	-115.155
KWS_143	UTA R-51270	C. annulata	Colorado, F	Colorado (0.9)	−	USA	California	Imperial	Hwy 78, 21.9 rd mi W jct Ogilby Rd	32.9745	-115.378
ROM14198	ROM14198	C. annulata	Colorado, F	Colorado (1.0)	X	USA	California	Imperial	Hwy 98, 2.9 mi w of junction of hwy 29	32.6793	-115.721
ROM13875	ROM13875	C. annulata	Colorado, F	Colorado (1.0)	X	USA	California	Imperial	Ocotillo, 2.6 mi northwest on Hwy S-2	32.7696	-116.034
ROM14031	ROM14031	C. annulata	Colorado, F	−	X	USA	California	Imperial	Ocotillo, Hwy 98, 7.8 mi east of jct. Hwy S-2	32.6715	-115.89
ROM14030	ROM14030	C. annulata	Colorado, F	Colorado (0.8)	X	USA	California	Imperial	Ocotillo, Hwy 98, 7.8 mi east of jct. Hwy S-2	32.6715	-115.89
ROM14035	ROM14035	C. annulata	Colorado, F	Colorado (0.8)	X	USA	California	Imperial	Ocotillo, Hwy 98, 7.8 mi east of jct. Hwy S-2	32.6715	-115.89
ROM14032	ROM14032	C. annulata	Colorado, F	Colorado (1.0)	X	USA	California	Imperial	Ocotillo, Hwy 98, 7.8 mi east of jct. Hwy S-2	32.6715	-115.89
ROM14033	ROM14033	C. annulata	Colorado, F	Colorado (1.0)	X	USA	California	Imperial	Ocotillo, Hwy 98, 7.8 mi east of jct. Hwy S-2	32.6715	-115.89
ROM14034	ROM14034	C. annulata	Colorado, F	Colorado (1.0)	X	USA	California	Imperial	Ocotillo, Hwy 98, 7.8 mi east of jct. Hwy S-2	32.6715	-115.89
SDField_1270	SDSNH 72555	C. annulata	−	Colorado (0.9)	−	USA	California	Imperial	Ocotillo, on S2 at Mesquite Rd	32.7403	-115.994
DAW_263	−	C. annulata	Colorado, F	Colorado (1.0)	−	USA	California	Imperial	S22, ca. 14.2 mi E of Pegleg Jct (Henderson Canyon Road)	33.2775	-116.064
SASSP2-66	−	C. annulata	−	Colorado (1.0)	−	USA	California	Imperial	Salton Sea Array 10	33.1798	-115.846
SASSP3-24	−	C. annulata	−	Colorado (1.0)	−	USA	California	Imperial	Salton Sea Array 10	33.1798	-115.846
SASSP7-22	−	C. annulata	Colorado, F	Admixed	−	USA	California	Imperial	Salton Sea Array 10	33.1798	-115.846
SALT10-1A	−	C. annulata	Colorado, F	Colorado (1.0)	−	USA	California	Imperial	Salton Sea Array 10	33.1798	-115.846
SASSP4-42	−	C. annulata	Colorado, F	Colorado (1.0)	−	USA	California	Imperial	Salton Sea Array 10	33.1798	-115.846
SALT_400	−	C. annulata	Colorado, F	Colorado (0.9)	−	USA	California	Imperial	Salton Sea Array 11	33.1875	-115.835
SALT12-3A	−	C. annulata	Colorado, F	Colorado (0.8)	−	USA	California	Imperial	Salton Sea Array 12	33.1872	-115.838
SASSP3-7	−	C. annulata	Colorado, F	Colorado (1.0)	−	USA	California	Imperial	Salton Sea Array 12	33.1872	-115.838
SASSP3-64	−	C. annulata	−	Admixed	−	USA	California	Imperial	Salton Sea Array 15	33.1867	-115.846
SASSP4-58	−	C. annulata	Colorado, F	Colorado (1.0)	−	USA	California	Imperial	Salton Sea Array 15	33.1867	-115.846
SASSP3-65	−	C. annulata	−	Mojave (0.8)	−	USA	California	Imperial	Salton Sea Array 16	33.1973	-115.837
SASSP4-63	−	C. annulata	−	Colorado (1.0)	−	USA	California	Imperial	Salton Sea Array 23	33.2039	-115.846
SALT_350	−	C. annulata	−	Colorado (0.9)	−	USA	California	Imperial	Salton Sea Array 24	33.2029	-115.849
SASSP3-46	−	C. annulata	−	Colorado (1.0)	−	USA	California	Imperial	Salton Sea Array 24	33.2029	-115.849
SASSP3-6	−	C. annulata	Colorado, F	Colorado (1.0)	−	USA	California	Imperial	Salton Sea Array 24	33.2029	-115.849
SASSP3-66	−	C. annulata	Colorado, F	Colorado (1.0)	−	USA	California	Imperial	Salton Sea Array 24	33.2029	-115.849
SASSP6-9	−	C. annulata	Colorado, F	Colorado (1.0)	−	USA	California	Imperial	Salton Sea Array 24	33.2029	-115.849
SASSP2-45	−	C. annulata	−	Colorado (1.0)	−	USA	California	Imperial	Salton Sea Array 25	33.2031	-115.851
SASSP2-67	−	C. annulata	−	Colorado (1.0)	−	USA	California	Imperial	Salton Sea Array 25	33.2031	-115.851
SASSP2-47	−	C. annulata	−	Colorado (0.8)	−	USA	California	Imperial	Salton Sea Array 27	33.2099	-115.848
SASSP4-28	−	C. annulata	−	Colorado (1.0)	−	USA	California	Imperial	Salton Sea Array 27	33.2099	-115.848
SASSP2-23	−	C. annulata	Colorado, F	Colorado (0.7)	−	USA	California	Imperial	Salton Sea Array 5	33.173	-115.845
SASSP4-55	−	C. annulata	Colorado, F	Colorado (1.0)	−	USA	California	Imperial	Salton Sea Array 5	33.173	-115.845
ANZA_4264	−	C. annulata	−	Colorado (0.9)	−	USA	California	San Diego	Anza Borrego State Park	33.1352	-116.351
ANZA_4277	−	C. annulata	−	Colorado (0.9)	−	USA	California	San Diego	Anza Borrego State Park	33.1592	-116.221
ANZA_4234	−	C. annulata	Colorado, F	Colorado (1.0)	−	USA	California	San Diego	Anza Borrego State Park	33.1343	-116.343
ANZA_4243	−	C. annulata	Colorado, F	Colorado (1.0)	−	USA	California	San Diego	Anza Borrego State Park	33.1352	-116.351
ANZA_4231	−	C. annulata	−	Colorado (0.9)	−	USA	California	San Diego	Anza Borrego State Park	33.1543	-116.189
ANZA_4240	−	C. annulata	−	Colorado (0.9)	−	USA	California	San Diego	Anza Borrego State Park	33.131	-116.305
ANZA_4246	−	C. annulata	−	Colorado (0.9)	−	USA	California	San Diego	Anza Borrego State Park	33.1546	-116.19
ANZA_4305	−	C. annulata	−	Colorado (0.9)	−	USA	California	San Diego	Anza Borrego State Park	33.1589	-116.235
ANZA_4239	−	C. annulata	−	Colorado (1.0)	−	USA	California	San Diego	Anza Borrego State Park	33.1394	-116.103
ANZA_4241	−	C. annulata	−	Colorado (1.0)	−	USA	California	San Diego	Anza Borrego State Park	33.133	-116.393
ANZA_4245	−	C. annulata	−	Colorado (1.0)	−	USA	California	San Diego	Anza Borrego State Park	33.1545	-116.189
ANZA_4247	−	C. annulata	−	Colorado (1.0)	−	USA	California	San Diego	Anza Borrego State Park	33.133	-116.323
ANZA_4248	−	C. annulata	−	Colorado (1.0)	−	USA	California	San Diego	Anza Borrego State Park	33.1444	-116.267
ANZA_4253	−	C. annulata	−	Colorado (1.0)	−	USA	California	San Diego	Anza Borrego State Park	33.1543	-116.189
KWS_53	−	C. annulata	Colorado, F	−	−	USA	California	San Diego	Borrego Springs Rd, 3.5 rd mi NW junction Hwy 78	33.1631	-116.336
SDField_2578	SDSNH 75013	C. annulata	Colorado, F	Colorado (0.9)	X	USA	California	San Diego	Borrego Springs, 4.5 mi ENE of, on S22	33.2666	-116.299
SDField_2579	SDSNH 75023	C. annulata	Colorado, F	Colorado (0.7)	X	USA	California	San Diego	Borrego Springs, 7.9 mi NE of	33.3037	-116.252
SDField_2787	SDSNH 75668	C. annulata	Colorado, F	Colorado (1.0)	X	USA	California	San Diego	Borrego Springs, Lazy S Dr	33.2699	-116.386
SDField_2716	SDSNH 75666	C. annulata	Colorado, F	Colorado (1.0)	X	USA	California	San Diego	Bow Willow, on S2	32.8493	-116.202
DAW_262	−	C. annulata	Colorado, F	Colorado (1.0)	−	USA	California	San Diego	Henderson Canyon Road, ca. 2 mi W of Pegleg Jct (S22)	33.3009	-116.322
KWS_169	−	C. annulata	Colorado, F	−	−	USA	California	San Diego	Hwy 78, 0.4 rd mi W junction Yaqui Pass Rd	33.1351	-116.386
KWS_49	−	C. annulata	Colorado, F	−	−	USA	California	San Diego	Hwy 78, 0.7 rd mi E junction Borrego Springs Rd	33.1591	-116.233
KWS_39	−	C. annulata	Colorado, F	−	−	USA	California	San Diego	Hwy 78, 1.6 rd mi E junction Borrego Springs Rd	33.1588	-116.217
KWS_157	−	C. annulata	Colorado, F	Admixed	−	USA	California	San Diego	Hwy 78, 5.3 rd mi W jct Borrego Springs Rd	32.9483	-114.892
DAW11_071	−	C. annulata	Colorado, F	−	−	USA	California	San Diego	S3, ~ 2 rd mi NE of Yaqui Pass junction	33.1458	-116.353
DAW11_072	−	C. annulata	Colorado, F	−	−	USA	California	San Diego	S3, ~ 3 rd mi NE of Yaqui Pass junction	33.1613	-116.338
JESMM_78	−	C. occipitalis	Mojave, A	Mojave (1.0)	−	USA	California	Inyo	12.6mi S jct Hwy 190 on Panamint Valley Rd	36.1956	-117.33
JESMM_62	−	C. occipitalis	Mojave, A	Mojave (0.9)	−	USA	California	Inyo	Hwy 127, 12.4mi S of Death Valley jct	36.1808	-116.332
DAW_355	SDSNH 76126	C. occipitalis	Mojave, A	Mojave (0.9)	X	USA	California	Inyo	Ninemile Canyon Road west of Hwy 395	35.8398	-117.891
DAW_348	SDSNH 76120	C. occipitalis	Mojave, A	Mojave (1.0)	X	USA	California	Inyo	Ninemile Canyon Road west of Hwy 395	35.8398	-117.891
DAW_349	SDSNH 76121	C. occipitalis	Mojave, A	Mojave (1.0)	X	USA	California	Inyo	Ninemile Canyon Road west of Hwy 395	35.8398	-117.891
DAW_350	SDSNH 76122	C. occipitalis	Mojave, A	Mojave (1.0)	X	USA	California	Inyo	Ninemile Canyon Road west of Hwy 395	35.8398	-117.891
DAW_351	SDSNH 76123	C. occipitalis	Mojave, A	Mojave (1.0)	X	USA	California	Inyo	Ninemile Canyon Road west of Hwy 395	35.8398	-117.891
DAW_352	SDSNH 76124	C. occipitalis	Mojave, A	Mojave (1.0)	X	USA	California	Inyo	Ninemile Canyon Road west of Hwy 395	35.8398	-117.891
DAW_353	SDSNH 76125	C. occipitalis	Mojave, A	Mojave (1.0)	X	USA	California	Inyo	Ninemile Canyon Road west of Hwy 395	35.8398	-117.891
DAW_354	−	C. occipitalis	Mojave, A	Mojave (1.0)	X	USA	California	Inyo	Ninemile Canyon Road west of Hwy 395	35.8398	-117.891
JESMM_114	−	C. occipitalis	Mojave, A	Mojave (0.9)	−	USA	California	Inyo	Panamint Valley Rd, 7.2mi S of jct Hwy 190	36.2598	-117.356
JESMM_113	−	C. occipitalis	Mojave, A	Mojave (1.0)	−	USA	California	Inyo	Panamint Valley Rd, 7.2mi S of jct Hwy 190	36.2598	-117.356
DS1SP4-149	−	C. occipitalis	−	Mojave (0.9)	−	USA	California	Kern	Dove Springs	35.4276	-118.004
DS1SP4-33	−	C. occipitalis	−	Mojave (0.9)	−	USA	California	Kern	Dove Springs	35.4366	-118.036
DS1SP4-52	−	C. occipitalis	−	Mojave (0.9)	−	USA	California	Kern	Dove Springs	35.4368	-118.041
DS1SP4-9	−	C. occipitalis	−	Mojave (0.9)	−	USA	California	Kern	Dove Springs	35.4164	-117.987
DS1SP14-172	−	C. occipitalis	−	Mojave (1.0)	−	USA	California	Kern	Dove Springs	35.4378	-118.039
DS1SP4-134	−	C. occipitalis	−	Mojave (1.0)	−	USA	California	Kern	Dove Springs	35.4368	-118.041
DS1SP4-196	−	C. occipitalis	−	Mojave (1.0)	−	USA	California	Kern	Dove Springs	35.4337	-118.018
DS1SP4-2	−	C. occipitalis	−	Mojave (1.0)	−	USA	California	Kern	Dove Springs	35.4323	-118.017
DS1SP4-305	−	C. occipitalis	−	Mojave (1.0)	−	USA	California	Kern	Dove Springs	35.4337	-118.018
DS1SP4-80	−	C. occipitalis	−	Mojave (1.0)	−	USA	California	Kern	Dove Springs	35.4352	-118.019
DS1SP6-43	−	C. occipitalis	−	Mojave (1.0)	−	USA	California	Kern	Dove Springs	35.4368	-118.041
DS1SP7-67	−	C. occipitalis	−	Mojave (1.0)	−	USA	California	Kern	Dove Springs	35.4323	-118.017
DS2SP4-236	−	C. occipitalis	−	Mojave (1.0)	−	USA	California	Kern	Dove Springs	35.4212	-118.016
DS2SP4-45	−	C. occipitalis	−	Mojave (1.0)	−	USA	California	Kern	Dove Springs	35.4237	-118.018
DS2SP5-61	−	C. occipitalis	−	Mojave (1.0)	−	USA	California	Kern	Dove Springs	35.4202	-118.031
RNF_5080	SDSNH 72191	C. occipitalis	−	Mojave (1.0)	−	USA	California	Kern	Dove Springs	35.4349	-118.019
RNF_5129	−	C. occipitalis	−	Mojave (1.0)	−	USA	California	Kern	Dove Springs	35.4366	-118.036
DS1SP14-12	−	C. occipitalis	Mojave, A	Mojave (0.9)	−	USA	California	Kern	Dove Springs	35.4233	-118.003
RNF_5062	SDSNH 72189	C. occipitalis	Mojave, A	Mojave (1.0)	X	USA	California	Kern	Dove Springs	35.4366	-118.036
RNF_5078	SDSNH 72190	C. occipitalis	Mojave, A	Mojave (1.0)	X	USA	California	Kern	Dove Springs	35.4237	-118.018
RNF_5093	SDSNH 72192	C. occipitalis	Mojave, A	Mojave (1.0)	X	USA	California	Kern	Dove Springs	35.4103	-118.035
DS1SP14-150	−	C. occipitalis	Mojave, A	Mojave (1.0)	−	USA	California	Kern	Dove Springs	35.436	-118.02
DS1SP4-197	−	C. occipitalis	Mojave, A	Mojave (1.0)	−	USA	California	Kern	Dove Springs	35.4349	-118.017
DS1SP4-199	−	C. occipitalis	Mojave, A	Mojave (1.0)	−	USA	California	Kern	Dove Springs	35.4349	-118.017
DS1SP4-254	−	C. occipitalis	Mojave, A	Mojave (1.0)	−	USA	California	Kern	Dove Springs	35.4349	-118.017
DS1SP4-6	−	C. occipitalis	Mojave, A	Mojave (1.0)	−	USA	California	Kern	Dove Springs	35.4381	-118.046
DS2SP15-16	−	C. occipitalis	Mojave, A	Mojave (1.0)	−	USA	California	Kern	Dove Springs	35.4136	-118.032
DS2SP6-51	−	C. occipitalis	Mojave, A	Mojave (1.0)	−	USA	California	Kern	Dove Springs	35.4163	-118.009
JTREE_1	−	C. occipitalis	−	Mojave (0.9)	−	USA	California	Riverside	Joshua Tree Night Driving Survey	33.8551	-115.79
JOSSP13-17	−	C. occipitalis	Sonoran, D	Mojave (1.0)	−	USA	California	Riverside	Joshua Tree Night Driving Survey	33.9093	-115.856
JTREE_2	−	C. occipitalis	Sonoran, D	Mojave (1.0)	−	USA	California	Riverside	Joshua Tree Night Driving Survey	33.8551	-115.79
MCC_370	−	C. occipitalis	−	Mojave (1.0)	−	USA	California	Riverside	Marine Corp Air Ground Combat Center	34.2835	-116.3
MCC_330	−	C. occipitalis	Mojave, A	Mojave (1.0)	−	USA	California	Riverside	Marine Corp Air Ground Combat Center	34.2835	-116.3
MCC_360	−	C. occipitalis	Mojave, A	Mojave (1.0)	−	USA	California	Riverside	Marine Corp Air Ground Combat Center	34.2835	-116.3
MCC_430	−	C. occipitalis	Mojave, A	Mojave (1.0)	−	USA	California	Riverside	Marine Corp Air Ground Combat Center	34.2835	-116.3
MCC_440	−	C. occipitalis	Mojave, A	Mojave (1.0)	−	USA	California	Riverside	Marine Corp Air Ground Combat Center	34.3177	-116.267
MCC_910	−	C. occipitalis	Mojave, A	Mojave (1.0)	−	USA	California	Riverside	Marine Corp Air Ground Combat Center	34.3245	-116.288
MCC_950	−	C. occipitalis	Mojave, A	Mojave (1.0)	−	USA	California	Riverside	Marine Corp Air Ground Combat Center	34.3234	-116.288
MCC_990	−	C. occipitalis	Mojave, A	Mojave (1.0)	−	USA	California	Riverside	Marine Corp Air Ground Combat Center	34.3245	-116.288
MESA_10-C	−	C. occipitalis	Mojave, B	Mojave (1.0)	−	USA	California	Riverside	Mesa Array 10	33.9621	-116.66
MESA_427	−	C. occipitalis	Mojave, B	Mojave (1.0)	−	USA	California	Riverside	Mesa Array 10	33.9605	-116.664
MESA_2-2B	−	C. occipitalis	Mojave, B	Mojave (0.9)	−	USA	California	Riverside	Mesa Array 2	33.9491	-116.669
MESA_3-2A	−	C. occipitalis	Mojave, B	Mojave (0.9)	−	USA	California	Riverside	Mesa Array 3	33.9605	-116.664
CJH_3-127	−	C. occipitalis	Mojave, B	Admixed	−	USA	California	Riverside	Palm Canyon	33.7302	-116.539
SDField_2985	−	C. occipitalis	Mojave, B	Mojave (0.8)	X	USA	California	Riverside	Palm Canyon	33.7639	-116.536
SDField_2986	−	C. occipitalis	Mojave, B	Mojave (1.0)	X	USA	California	Riverside	Palm Canyon	33.7353	-116.537
SDField_2989	−	C. occipitalis	Mojave, B	Mojave (1.0)	X	USA	California	Riverside	Palm Canyon	33.761	-116.545
SDField_3015	−	C. occipitalis	Mojave, B	Mojave (1.0)	X	USA	California	Riverside	Palm Canyon	33.7452	-116.537
SDField_3025	−	C. occipitalis	Mojave, B	Mojave (1.0)	X	USA	California	Riverside	Palm Canyon	33.7613	-116.544
SDField_3044	−	C. occipitalis	Mojave, B	Mojave (1.0)	X	USA	California	Riverside	Palm Canyon	33.7433	-116.539
SDField_2977	−	C. occipitalis	Mojave, B	Mojave (1.0)	−	USA	California	Riverside	Palm Canyon, Agua Bonita Spring	33.7436	-116.537
BLM_330	−	C. occipitalis	Mojave, A	Mojave (1.0)	−	USA	California	Riverside	TwentyNine Palms, BLM Array	34.2071	-116.151
DGM_681	−	C. occipitalis	Sonoran, D	−	−	USA	California	San Bernadino	Hwy 62 , 32mi W of Vidal Jct	34.0905	-115.084
JESMM_109	−	C. occipitalis	−	Mojave (0.9)	−	USA	California	San Bernadino	Hwy 62 E of 29 Palms, near Sheep Hole Mtns	34.1135	-115.495
JESMM_80	−	C. occipitalis	Mojave, A	Mojave (1.0)	−	USA	California	San Bernadino	Trona Rd 8.3mi S jct Hwy 178;DOR	35.5549	-117.571
CSB_3-56-1	−	C. occipitalis	Mojave, A	Mojave (0.7)	−	USA	California	San Bernardino	Dumont Dunes, Hwy 127	35.673	-116.299
DAW_324	SDSNH 76113	C. occipitalis	Mojave, A	Mojave (0.7)	X	USA	California	San Bernardino	Hwy 127, 11 mi N of Baker, N of Silver Lake	35.4028	-116.128
DAW_316	SDSNH 76107	C. occipitalis	Sonoran, D	Mojave (1.0)	X	USA	California	San Bernardino	Hwy 62, 11.7 mi E of Jct with Hwy 177	34.0968	-115.03
DAW_315	SDSNH 76106	C. occipitalis	Sonoran, D	Mojave (0.8)	X	USA	California	San Bernardino	Hwy 62, 11.9 mi E of Jct with Hwy 177	34.0973	-115.026
DAW_314	SDSNH 76105	C. occipitalis	Sonoran, D	Mojave (0.9)	X	USA	California	San Bernardino	Hwy 62, 11.9 mi E of Jct with Hwy 177	34.0975	-115.024
DAW_319	SDSNH 76109	C. occipitalis	Sonoran, D	Mojave (1.0)	X	USA	California	San Bernardino	Hwy 62, 12 mi E of Jct with Hwy 177	34.0974	-115.024
DAW_313	SDSNH 76104	C. occipitalis	Sonoran, D	Mojave (1.0)	X	USA	California	San Bernardino	Hwy 62, 12.5 mi E of Jct with Hwy 177	34.0986	-115.015
DAW_320	SDSNH 76110	C. occipitalis	Sonoran, D	Mojave (1.0)	X	USA	California	San Bernardino	Hwy 62, 12.9 mi E of Jct with Hwy 177	34.0991	-115.009
DAW_312	SDSNH 76103	C. occipitalis	Sonoran, D	Mojave (0.8)	X	USA	California	San Bernardino	Hwy 62, 13.2 mi E of Jct with Hwy 177	34.1008	-114.995
DAW_311	SDSNH 76102	C. occipitalis	Sonoran, D	Mojave (1.0)	X	USA	California	San Bernardino	Hwy 62, 13.2 mi E of Jct with Hwy 177	34.1004	-114.998
DAW_310	SDSNH 76101	C. occipitalis	Sonoran, D	Mojave (0.8)	X	USA	California	San Bernardino	Hwy 62, 13.5 mi E of Jct with Hwy 177	34.0998	-115.003
DAW_321	SDSNH 76111	C. occipitalis	Sonoran, D	Mojave (1.0)	X	USA	California	San Bernardino	Hwy 62, 14 mi E of Jct with Hwy 177	34.1016	-114.989
DAW_322	SDSNH 76112	C. occipitalis	Sonoran, D	Mojave (0.8)	X	USA	California	San Bernardino	Hwy 62, 14.1 mi E of Jct with Hwy 177	34.1018	-114.987
DAW_318	SDSNH 76108	C. occipitalis	Sonoran, D	Mojave (1.0)	X	USA	California	San Bernardino	Hwy 62, 9 mi E of Jct with Hwy 177	34.0924	-115.069
DAW_327	SDSNH 76115	C. occipitalis	Mojave, A	Mojave (0.8)	X	USA	California	San Bernardino	Kelbaker Road, 3.0 mi S of Baker	35.2565	-116.026
DAW_325	SDSNH 76114	C. occipitalis	Mojave, A	Mojave (0.9)	X	USA	California	San Bernardino	Kelbaker Road, 3.4 mi S of Baker	35.2564	-116.014
RCT_200	−	C. occipitalis	Mojave, A	Mojave (1.0)	−	USA	California	San Bernardino	Kelso Cima Road	35.0302	-115.628
SDField_2964	−	C. occipitalis	Mojave, A	Mojave (0.9)	X	USA	California	San Bernardino	Marine Corp Air Ground Combat Center, Lead Mountain Training Area	34.4776	-115.864
DAW_356	−	C. occipitalis	Mojave, A	Mojave (0.9)	X	USA	Nevada	Nye	Amragosa Valley, Valley Vista Boulevard	36.6512	-116.543
DAW_357	SDSNH 76127	C. occipitalis	Mojave, A	Mojave (0.9)	X	USA	Nevada	Nye	Amragosa Valley, Valley Vista Boulevard	36.676	-116.543
ROM15003	ROM15003	C. palarostris	−	−	X	Mexico	Sonora		Hwy 8	31.6861	-113.291
ATH_564	ASU_34620	C. palarostris	−	−	X	USA	Arizona	Pima	Organ Pipe National Monument	32.032	-112.799
ATH_565	ASU_34621	C. palarostris	−	−	X	USA	Arizona	Pima	Organ Pipe National Monument	32.1412	-112.766
